# Supplementary material
Source: publisher site journal article supplement (https://www.dovepress.com/article/301448)
Supplement: Supplementary file 1 [file get_supplementary_file.php]

**Supplementary Figure 1: Hip abduction strength. (a) Knee only or Hip only exercise programs compared with Controls. (b) Hip only or Hip&Knee exercise programs compared with Knee only exercise programs.**

**
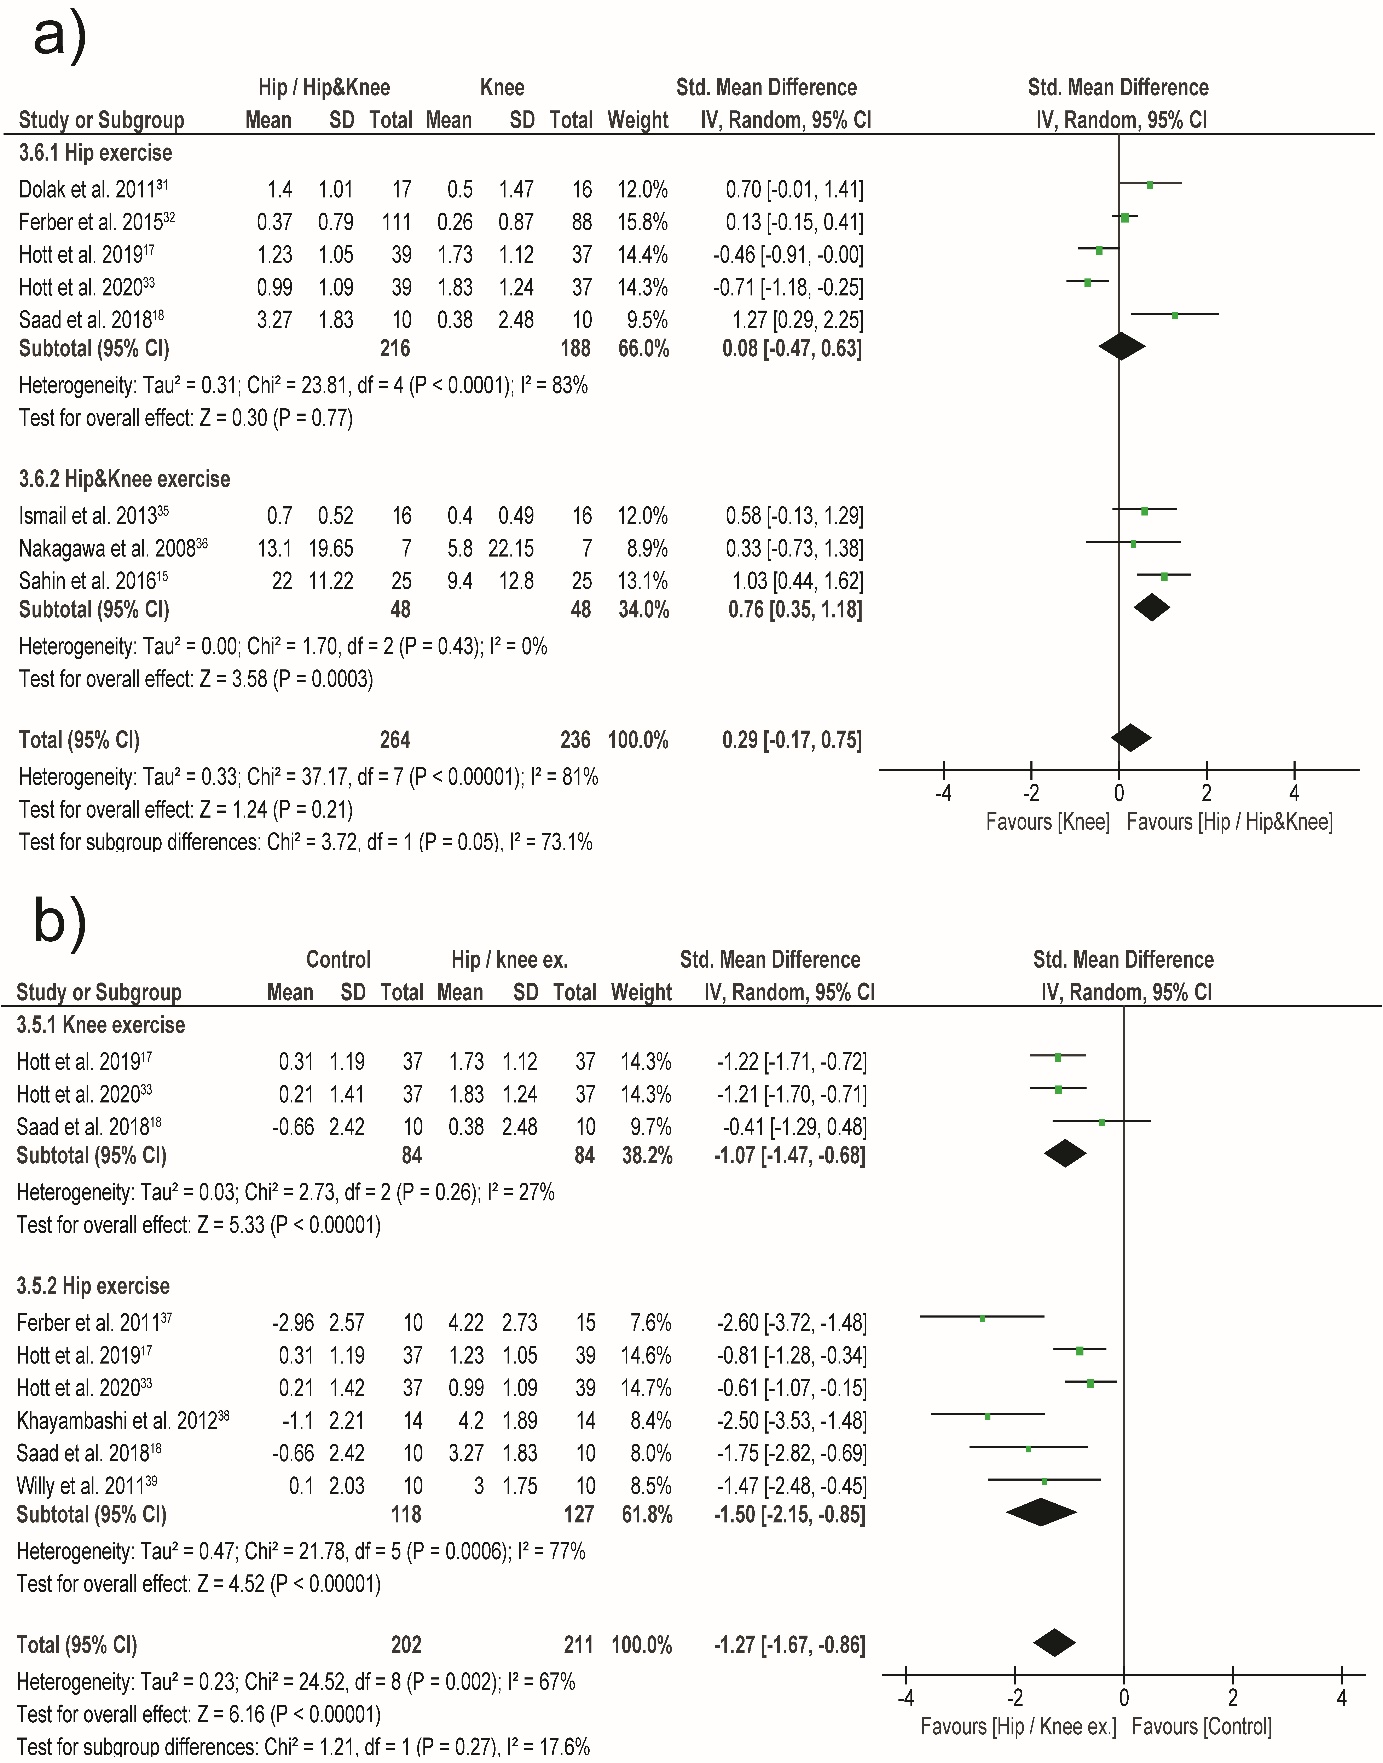
**

**Supplementary Figure 2: Hip external rotation strength. (a) Hip only or Knee only exercise programs compared with Controls. (b) Hip only or Hip&Knee exercise programs compared with Knee only exercise programs.**

**
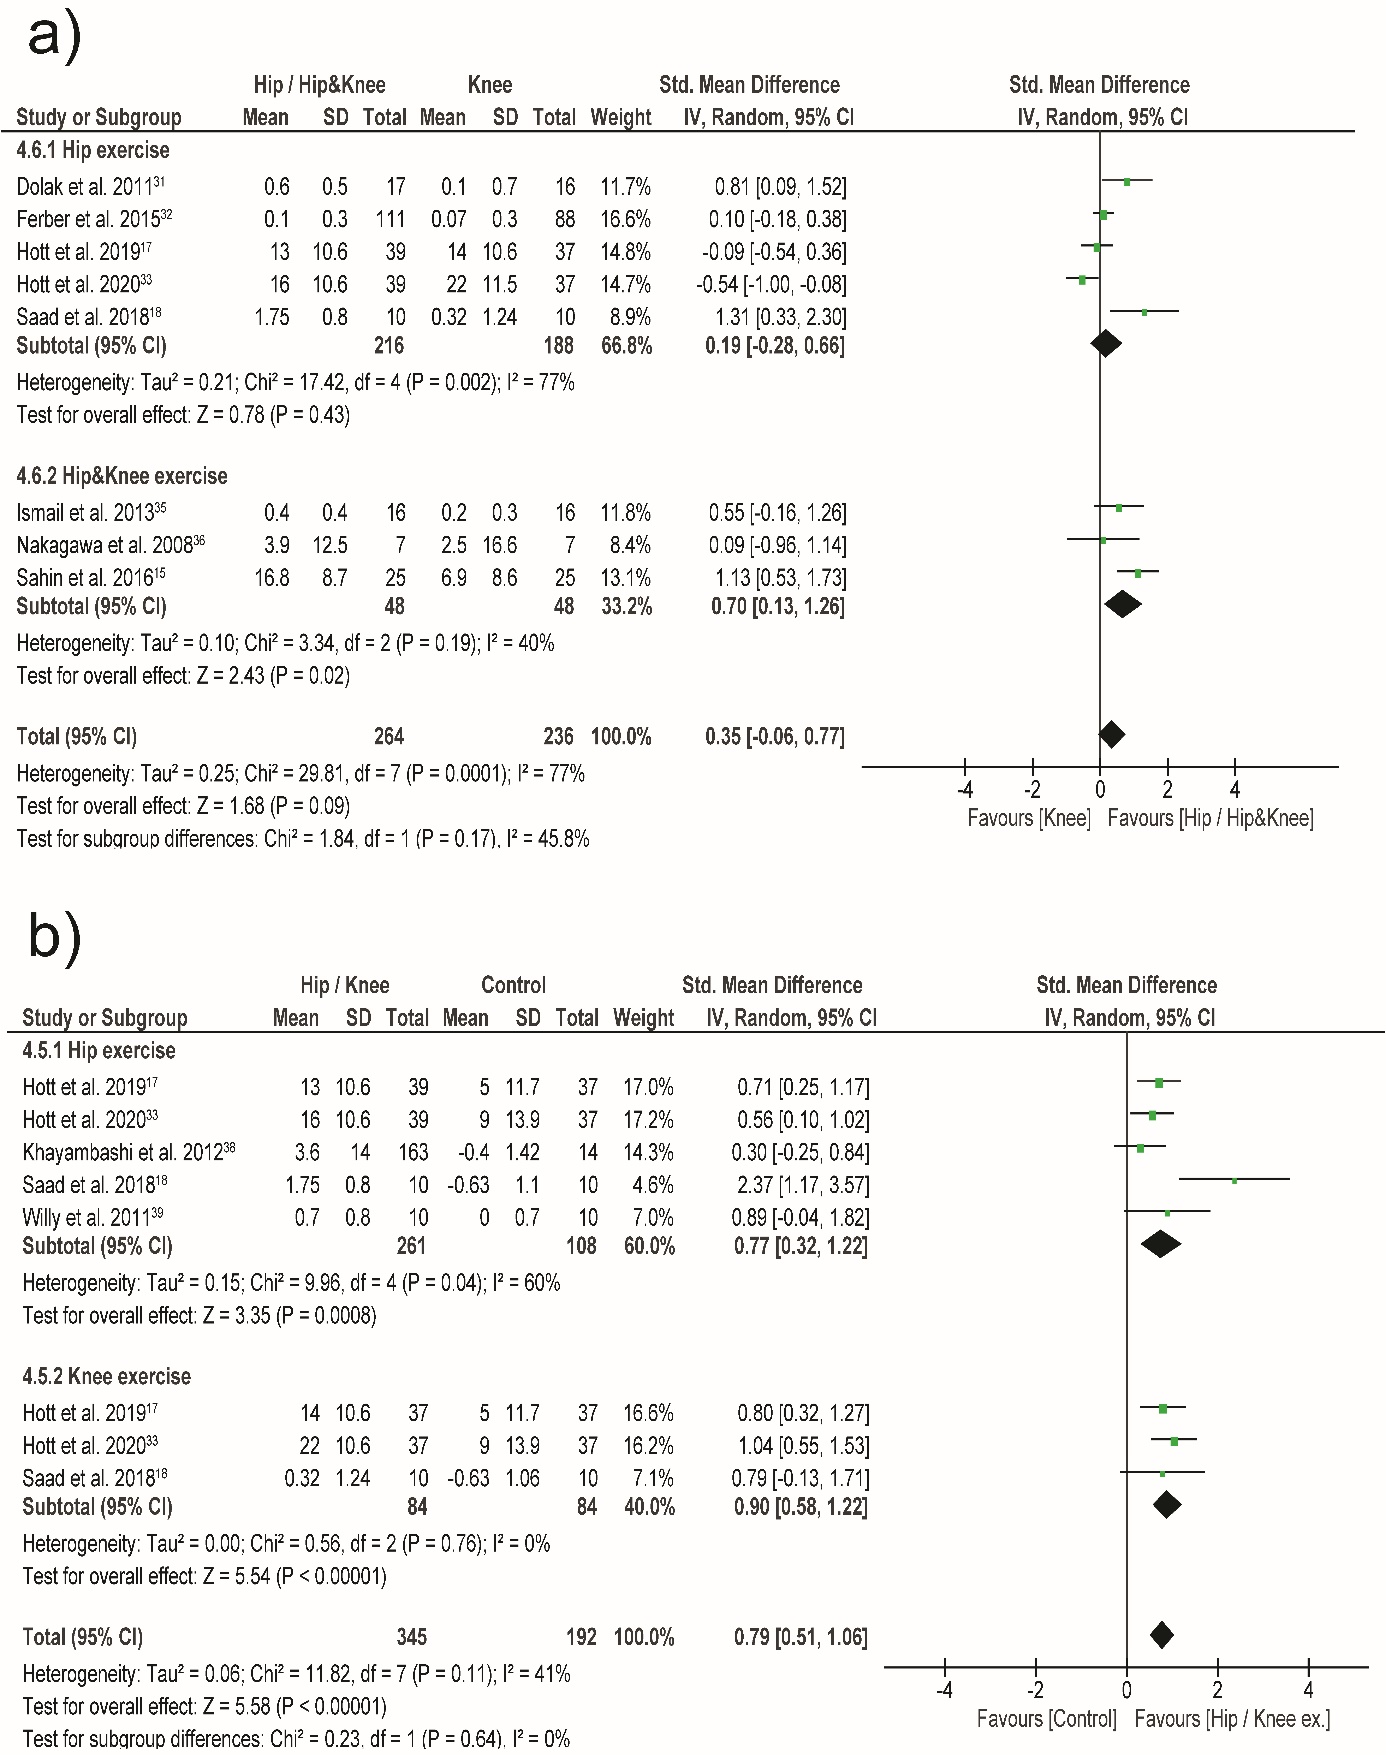
**
